# Supplementary material for: Edge-Intelligent Electric Vehicle Charging Coordination for Grid Load Balancing and Renewable Integration
Source: Research Square preprint supplement (doi:10.21203/rs.3.rs-6922164/v1), 2025-06-24
Supplement: Supplementary file 1 [file 0fcb875669834c21be3af2ea.docx]

Edge-Intelligent Electric Vehicle Charging Coordination for Grid Load Balancing and Renewable Integration

***HIGHLIGHTS***

1. A distributed edge-AI architecture is developed for real-time electric vehicle (EV) charging coordination, enhancing grid load balancing and supporting renewable energy integration.
2. Lightweight hybrid AI models (CNN+LSTM, XGBoost, Random Forest) are deployed at the network edge to predict user charging behavior, station availability, and dynamic pricing with high accuracy.
3. The decentralized framework reduces communication overhead by approximately 80%, minimizes decision latency, and increases system responsiveness under dynamic grid conditions.
4. Experimental results demonstrate a 27.6% improvement in charging station utilization, a 24.5% reduction in peak grid load, and a 29.8% decrease in average user charging costs.
5. The proposed system offers a scalable, energy-aware solution for intelligent EV infrastructure management in future smart grids, supporting sustainable urban mobility and energy optimization.
